# Supplementary material
Source: HighWire-hosted journal article supplement (https://ard.bmj.com/content/76/2/364)
Supplement: inline-supplementary-material-1 [file inline-supplementary-material-1.pdf]

# Supplementary Material

**eTable 1** ICD codes used for definition of exposures (AS and RA), outcomes (ACS, Stroke, and DVT/PE), and comorbidities (any CV disease, COPD, diabetes, and malignancy)

| Exposures/Outcomes/Comorbidities | ICD-10                                       | ICD-9         | ICD-8                             |
|----------------------------------|----------------------------------------------|---------------|-----------------------------------|
| <b>Exposures</b>                 |                                              |               |                                   |
| AS                               | M45                                          |               |                                   |
| RA                               | M05, M060, M062,<br>M063, M068, M069<br>M123 |               |                                   |
| <b>Outcomes</b>                  |                                              |               |                                   |
| ACS (primary diagnosis)          | I20-I21                                      |               |                                   |
| Stroke                           | I60-I61, I63                                 |               |                                   |
| DVT/PE                           | I26, I80-I82                                 | 451-453, 415B | 450-453                           |
| <b>Exclusion diagnoses</b>       |                                              |               |                                   |
| <b>ACS</b>                       |                                              |               |                                   |
| - Ischemic heart disease         | I20-I25                                      | 410-414       | 410-414                           |
| - Congestive heart disease       | I42, I50                                     | 425, 428      | 425, 427.0-427.1, 428.9           |
| <b>Stroke</b>                    |                                              |               |                                   |
| - Ischemic stroke                | I63                                          | 433, 434      | 432-434<br>430, 431.00, 431.08-   |
| - Haemorrhagic stroke            | I60-I61                                      | 430-431       | 431.09, 431.90, 431.98-<br>431.99 |
| - Unspecified stroke             | I64                                          | 436           | 436                               |
| <b>Comorbidities</b>             |                                              |               |                                   |
| Any CV disease                   | I00-I99                                      | 400-499       |                                   |
| COPD                             | J41-J44                                      | 491-492, 496  |                                   |
| Diabetes                         | E10-E11                                      | 250           |                                   |
| Malignancy                       | Identified from the Swedish Cancer Register  |               |                                   |

AS: ankylosing spondylitis; RA: rheumatoid arthritis; ACS: acute coronary syndromes; DVT: deep venous thromboembolism; PE: pulmonary embolism; CV: Cardiovascular; COPD: chronic obstructive pulmonary disease

**eTable 2** ATC codes used for definition of drug groups

| <b>Drug group</b>                | <b>ATC code</b>                                  |
|----------------------------------|--------------------------------------------------|
| NSAIDs                           | M01A                                             |
| - Naproxen                       | M01AE02                                          |
| - COX-2 inhibitors               | M01AH                                            |
| - Other NSAIDs                   | M01A with Naproxen and COX-2 inhibitors excluded |
| Diuretics                        | C03                                              |
| Beta-blockers                    | C07                                              |
| ACE-inhibitors / All antagonists | C09                                              |
| Calcium blockers                 | C08                                              |
| Warfarin                         | B01AA03                                          |
| Aspirin                          | B01AC06                                          |
| Other anti-thrombotic drugs      | B01AC04, B01AC07, B01AC13, B01AC24               |
| Anti-diabetics and insulin       | A10B, A10A                                       |
| Statins                          | C10AA                                            |
| TNFi                             | L04AB01, L04AB02, L04AB04, L04AB05, L04AB06      |

NSAID: nonsteroidal anti-inflammatory drugs; COX-2: cyclo-oxygenase-2 inhibitor;

ACE-inhibitors: angiotensin-converting-enzyme inhibitor

**eTable 3** Sex- and age adjusted hazard ratios for ACS, stroke and DVT/PE in patients with AS, RA, and the general population in Sweden, identified 2006-2011, followed for first ever CV outcomes 2007 through Dec 31<sup>st</sup> 2012

| Measure/Group          | ACS            |                |               | Stroke        |               |               | DVT/PE        |               |               |
|------------------------|----------------|----------------|---------------|---------------|---------------|---------------|---------------|---------------|---------------|
|                        | AS vs GenPop   | RA vs GenPop   | AS vs RA      | AS vs GenPop  | RA vs GenPop  | AS vs RA      | AS vs GenPop  | RA vs GenPop  | AS vs RA      |
| <b>HR</b>              |                |                |               |               |               |               |               |               |               |
| Overall                | 1.3 (1.0-1.7)  | 1.7 (1.4-2.0)  | 0.8 (0.6-1.0) | 1.5 (1.1-2.0) | 1.5 (1.2-1.8) | 1.0 (0.8-1.3) | 1.4 (1.1-1.9) | 1.8 (1.5-2.1) | 0.8 (0.6-1.0) |
| <b>Sex-specific HR</b> |                |                |               |               |               |               |               |               |               |
| - Men                  | 1.3 (1.0-1.8)  | 1.7 (1.4-2.1)  | 0.7 (0.6-1.0) | 1.3 (0.9-1.8) | 1.3 (1.1-1.7) | 0.9 (0.7-1.3) | 1.6 (1.1-2.2) | 2.1 (1.7-2.7) | 0.7 (0.5-1.0) |
| - Women                | 1.1 (0.5-2.3)  | 2.1 (1.4-3.0)  | 0.5 (0.3-1.1) | 2.5 (1.4-4.3) | 2.0 (1.4-2.8) | 1.3 (0.8-2.0) | 1.2 (0.7-2.0) | 1.5 (1.2-2.0) | 0.8 (0.5-1.3) |
| <b>Age-specific HR</b> |                |                |               |               |               |               |               |               |               |
| - 18-39y               | 2.4 (0.3-19.4) | 6.1 (0.8-46.1) | 1.1 (0.1-8.9) | 1.9 (0.5-7.4) | 1.7 (0.4-8.0) | 0.9 (0.1-5.5) | 1.9 (0.8-4.4) | 2.0 (0.9-4.1) | 0.7 (0.3-1.9) |
| - 40-49y               | 1.5 (0.7-3.5)  | 2.5 (1.3-4.7)  | 0.5 (0.2-1.2) | 1.5 (0.5-4.1) | 1.4 (0.6-3.1) | 1.4 (0.5-4.3) | 0.8 (0.3-1.9) | 1.8 (1.0-3.0) | 0.5 (0.2-1.2) |
| - 50-59y               | 1.1 (0.7-1.8)  | 1.6 (1.2-2.2)  | 0.7 (0.4-1.1) | 1.6 (0.9-2.9) | 1.5 (1.0-2.3) | 1.2 (0.7-2.2) | 1.4 (0.8-2.4) | 2.0 (1.4-2.8) | 0.7 (0.4-1.2) |
| - 60-69y               | 1.2 (0.8-1.9)  | 1.5 (1.2-2.0)  | 0.8 (0.5-1.2) | 1.7 (1.1-2.7) | 1.5 (1.1-2.0) | 1.2 (0.8-1.8) | 1.7 (1.1-2.7) | 1.8 (1.4-2.4) | 0.9 (0.6-1.3) |
| - 70-79y               | 1.9 (1.0-3.9)  | 1.7 (1.1-2.7)  | 1.1 (0.6-2.0) | 1.3 (0.7-2.4) | 1.6 (1.2-2.3) | 0.8 (0.5-1.4) | 1.5 (0.7-3.2) | 1.8 (1.2-2.7) | 0.8 (0.4-1.6) |
| - ≥80y                 | -              | -              | -             | 0.8 (0.2-2.9) | 0.9 (0.5-1.7) | 0.8 (0.3-2.5) | 1.0 (0.2-4.6) | 1.0 (0.5-2.0) | 0.9 (0.2-3.7) |

AS: ankylosing spondylitis; RA: rheumatoid arthritis; ACS: acute coronary syndromes; DVT: deep venous thromboembolism; PE: pulmonary embolism; CV: Cardiovascular; COPD: chronic obstructive pulmonary disease; HR: hazard ratio

**eTable 4** Overall number of study subjects, events, and sum of follow-up years, and overall, sex-, and age-specific incidence rates per 1000 person-years (95% CI) of ACS, stroke, and DVT/PE in the three cohorts of Swedish patients with Ankylosing Spondylitis (AS), Rheumatoid Arthritis (RA) and general population comparator subjects (GenPop) **identified 2001 through 2011** and followed for CV incidence through December 31<sup>st</sup> 2012

| Measure/Group             | ACS             |                  |                 | Stroke          |                  |                  | DVT/PE          |                  |                |
|---------------------------|-----------------|------------------|-----------------|-----------------|------------------|------------------|-----------------|------------------|----------------|
|                           | AS              | RA               | GenPop          | AS              | RA               | GenPop           | AS              | RA               | GenPop         |
| N                         | 6813            | 39 084           | 31 198          | 7288            | 43 711           | 34 023           | 7261            | 43 490           | 33 880         |
| N events                  | 160             | 2166             | 540             | 128             | 2015             | 426              | 135             | 1876             | 462            |
| Follow-up (years)         | 44 680          | 244 695          | 20 7091         | 47 764          | 269 712          | 225 912          | 47 483          | 267 226          | 224 898        |
| <b>Overall rates</b>      |                 |                  |                 |                 |                  |                  |                 |                  |                |
| - Crude                   | 3.6 (3.0-4.1)   | 8.9 (8.5-9.2)    | 2.6 (2.4-2.8)   | 2.7 (2.2-3.1)   | 7.5 (7.1-7.8)    | 1.9 (1.7-2.1)    | 2.8 (2.4-3.3)   | 7.0 (6.7-7.3)    | 2.1 (1.9-2.2)  |
| - Standardised*           | -               | 5.1 (4.8-5.4)    | -               | -               | 2.9 (2.7-3.1)    | -                | -               | 4.2 (3.9-4.4)    | -              |
| <b>Sex-specific rates</b> |                 |                  |                 |                 |                  |                  |                 |                  |                |
| - Men                     | 4.6 (3.9-5.4)   | 13.3 (12.4-14.2) | 3.3 (3.0-3.6)   | 2.9 (2.3-3.5)   | 8.9 (8.2-9.6)    | 2.1 (1.9-2.4)    | 2.8 (2.2-3.4)   | 7.3 (6.7-8.0)    | 2.1 (1.8-2.3)  |
| - Women                   | 1.5 (0.9-2.1)   | 7.5 (7.1-7.8)    | 1.3 (1.0-1.5)   | 2.1 (1.4-2.9)   | 7.0 (6.6-7.3)    | 1.3 (1.1-1.6)    | 2.9 (2.0-3.7)   | 6.9 (6.5-7.3)    | 2.0 (1.7-2.4)  |
| <b>Age-specific rates</b> |                 |                  |                 |                 |                  |                  |                 |                  |                |
| - 18-39y                  | 0.6 (0.2-1.0)   | 0.4 (0.1-0.6)    | 0.2 (0.1-0.3)   | 0.4 (0.1-0.8)   | 0.3 (0.1-0.5)    | 0.2 (0.1-0.4)    | 1.0 (0.5-1.5)   | 2.0 (1.4-2.5)    | 0.8 (0.6-1.0)  |
| - 40-49y                  | 2.2 (1.3-3.0)   | 2.2 (1.7-2.7)    | 1.7 (1.3-2.0)   | 1.1 (0.5-1.7)   | 1.3 (0.9-1.7)    | 0.7 (0.5-1.0)    | 2.0 (1.2-2.8)   | 3.1 (2.4-3.7)    | 1.6 (1.2-1.9)  |
| - 50-59y                  | 5.6 (4.2-7.0)   | 5.7 (5.1-6.3)    | 4.3 (3.8-4.9)   | 3.2 (2.2-4.2)   | 2.9 (2.5-3.3)    | 2.2 (1.8-2.6)    | 3.6 (2.6-4.7)   | 4.8 (4.3-5.3)    | 2.6 (2.2-3.0)  |
| - 60-69y                  | 9.4 (6.6-12.2)  | 9.0 (8.3-9.8)    | 6.6 (5.6-7.7)   | 6.8 (4.7-8.9)   | 7.0 (6.4-7.6)    | 4.6 (3.8-5.4)    | 5.6 (3.7-7.6)   | 7.8 (7.2-8.5)    | 3.8 (3.1-4.4)  |
| - 70-79y                  | 16.2 (8.5-23.9) | 18.4 (17.1-19.7) | 13.2 (9.7-16.7) | 14.5 (8.4-20.5) | 16.0 (14.9-17.1) | 10.7 (8.4-13.1)  | 10.1 (5.1-15.0) | 11.4 (10.5-12.3) | 5.9 (4.1-7.6)  |
| - ≥80y                    | -               | 25.9 (23.1-28.7) | 16.1 (3.2-28.9) | 22.4 (4.5-40.3) | 24.9 (22.4-27.3) | 27.0 (16.2-37.7) | 6.6 (0.0-15.7)  | 13.8 (12.0-15.6) | 7.8 (2.4-13.2) |

\*Standardised to the age- and sex distribution of the AS cohort;

ACS: acute coronary syndromes; DVT: deep venous thromboembolism; PE: pulmonary embolism

**eTable 5** Sex- and age adjusted hazard ratios for ACS, stroke and DVT/PE in patients with AS, RA, and the general population in Sweden, **identified 2001-2011**, followed for first ever CV outcomes 2007 through Dec 31<sup>st</sup> 2012

| Measure/Group          | ACS           |               |               | Stroke        |               |               | DVT/PE        |               |               |
|------------------------|---------------|---------------|---------------|---------------|---------------|---------------|---------------|---------------|---------------|
|                        | AS vs GenPop  | RA vs GenPop  | AS vs RA      | AS vs GenPop  | RA vs GenPop  | AS vs RA      | AS vs GenPop  | RA vs GenPop  | AS vs RA      |
| <b>HR</b>              |               |               |               |               |               |               |               |               |               |
| Overall                | 1.3 (1.1-1.5) | 1.6 (1.4-1.8) | 0.8 (0.7-0.9) | 1.4 (1.1-1.7) | 1.4 (1.2-1.6) | 1.0 (0.8-1.2) | 1.4 (1.1-1.7) | 1.9 (1.7-2.1) | 0.7 (0.6-0.9) |
| <b>Sex-specific HR</b> |               |               |               |               |               |               |               |               |               |
| - Men                  | 1.3 (1.1-1.6) | 1.6 (1.4-1.8) | 0.7 (0.6-0.9) | 1.3 (1.0-1.6) | 1.4 (1.2-1.6) | 0.9 (0.7-1.1) | 1.3 (1.1-1.7) | 2.0 (1.7-2.4) | 0.6 (0.5-0.8) |
| - Women                | 1.1 (0.7-1.8) | 2.1 (1.7-2.6) | 0.5 (0.4-0.8) | 1.6 (1.1-2.3) | 1.6 (1.3-2.0) | 1.0 (0.7-1.4) | 1.4 (1.0-2.0) | 1.8 (1.5-2.2) | 0.8 (0.6-1.1) |
| <b>Age-specific HR</b> |               |               |               |               |               |               |               |               |               |
| - 18-39y               | 3.1 (1.4-6.9) | 3.2 (1.3-8.3) | 0.9 (0.3-2.6) | 1.9 (0.8-4.5) | 1.6 (0.6-4.2) | 1.8 (0.6-5.7) | 1.3 (0.7-2.2) | 2.0 (1.3-3.1) | 0.7 (0.4-1.3) |
| - 40-49y               | 1.2 (0.8-1.8) | 1.9 (1.3-2.6) | 0.7 (0.4-1.1) | 1.4 (0.8-2.6) | 1.5 (0.9-2.4) | 0.9 (0.5-1.7) | 1.2 (0.8-1.9) | 2.0 (1.4-2.7) | 0.6 (0.4-1.0) |
| - 50-59y               | 1.2 (0.9-1.6) | 1.8 (1.5-2.2) | 0.7 (0.5-0.9) | 1.4 (1.0-2.0) | 1.4 (1.1-1.8) | 1.0 (0.7-1.5) | 1.4 (1.0-1.9) | 1.9 (1.5-2.3) | 0.7 (0.5-1.0) |
| - 60-69y               | 1.4 (1.0-1.9) | 1.6 (1.3-2.0) | 0.8 (0.6-1.1) | 1.4 (1.0-2.0) | 1.5 (1.2-1.8) | 1.0 (0.7-1.3) | 1.5 (1.0-2.2) | 2.0 (1.6-2.5) | 0.7 (0.5-1.0) |
| - 70-79y               | 1.2 (0.7-2.0) | 1.4 (1.0-1.8) | 0.9 (0.5-1.4) | 1.3 (0.8-2.1) | 1.4 (1.1-1.8) | 0.9 (0.6-1.5) | 1.7 (1.0-3.1) | 1.6 (1.2-2.2) | 1.1 (0.6-1.8) |
| - ≥80y                 | -             | 1.6 (0.7-3.7) | -             | 0.9 (0.3-2.1) | 0.9 (0.6-1.3) | 1.0 (0.4-2.1) | 1.0 (0.2-4.8) | 1.7 (0.8-3.4) | 0.5 (0.1-2.1) |

AS: ankylosing spondylitis; RA: rheumatoid arthritis; ACS: acute coronary syndromes; DVT: deep venous thromboembolism; PE: pulmonary embolism; CV: Cardiovascular; COPD: chronic obstructive pulmonary disease; HR: hazard ratio

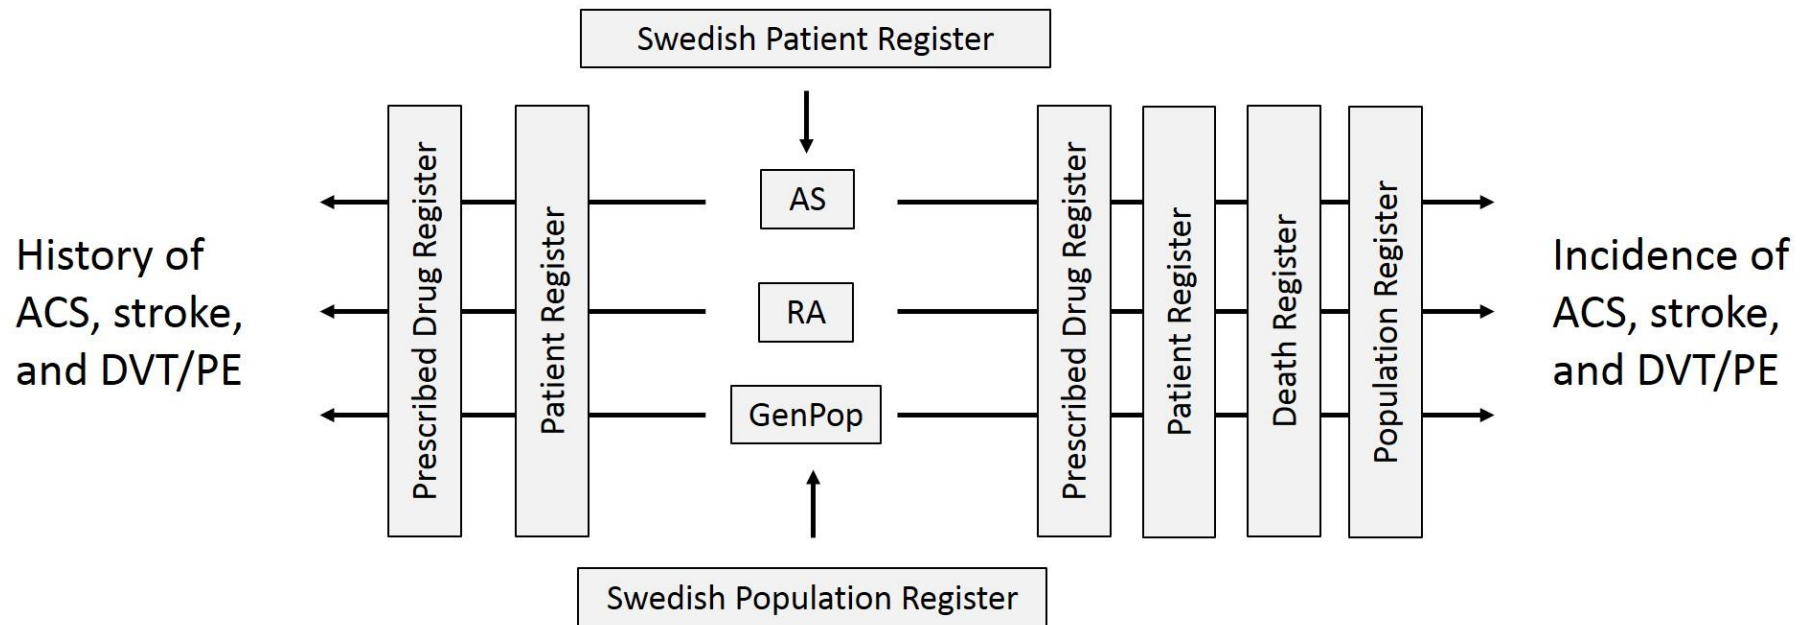

**eFigure 1** Schematic of the register linkages used to identify a national cohort of patients with AS, a national cohort of patients with RA, a matched general population comparator cohort, previous medical histories, and incident cardiovascular outcomes during the study period

AS: ankylosing spondylitis; RA: rheumatoid arthritis; GenPop: general population comparators; ACS: acute coronary syndromes; DVT: deep venous thromboembolism; PE: pulmonary embolism
